# Supplementary material for: The Genetic Interpretation of Area under the ROC Curve in Genomic Profiling
Source: PubMed Central journal article supplement (PMC2829056; doi:10.1371/journal.pgen.1000864), 2010-02-26
Supplement: pgen.1000864.s002.pdf [file pgen.1000864.s002.pdf]

Table S1 AUC related statistics for complex genetic diseases: Table 1 with added columns considering family history.

| Disease                          | $AUC = 0.75^d$ |             |         |               |                |                |               |                                                | Full knowledge of 3 generation family history <sup>e</sup> |               |
|----------------------------------|----------------|-------------|---------|---------------|----------------|----------------|---------------|------------------------------------------------|------------------------------------------------------------|---------------|
|                                  | $K \times 100$ | $\lambda_S$ | $h_L^2$ | $AUC_{max}^a$ | $AUC_{half}^b$ | $AUC_{quar}^c$ | $\rho_{GG}^2$ | $\frac{(\lambda_{S[x]} - 1)}{(\lambda_S - 1)}$ | $AUC$                                                      | $\rho_{GG}^2$ |
| Age related macular degeneration | 11.8           | 2.2         | 0.68    | 0.92          | 0.81           | 0.72           | 0.31          | 0.27                                           | 0.71                                                       | 0.21          |
| Unipolar disorder                | 10             | 1.7         | 0.39    | 0.84          | 0.74           | 0.67           | 0.52          | 0.49                                           | 0.62                                                       | 0.12          |
| Coronary Artery Disease          | 5.6            | 3.2         | 0.72    | 0.95          | 0.84           | 0.75           | 0.25          | 0.18                                           | 0.71                                                       | 0.16          |
| Breast cancer                    | 3.6            | 2.5         | 0.44    | 0.89          | 0.79           | 0.71           | 0.36          | 0.29                                           | 0.62                                                       | 0.08          |
| Type-II diabetes                 | 3              | 3.5         | 0.60    | 0.94          | 0.84           | 0.75           | 0.25          | 0.18                                           | 0.66                                                       | 0.10          |
| Prostate cancer                  | 2.4            | 2.8         | 0.44    | 0.90          | 0.80           | 0.72           | 0.33          | 0.25                                           | 0.59                                                       | 0.04          |
| Asthma                           | 2              | 2.6         | 0.37    | 0.88          | 0.79           | 0.71           | 0.37          | 0.29                                           | 0.58                                                       | 0.04          |
| Lung cancer                      | 1.7            | 6.1         | 0.76    | 0.98          | 0.89           | 0.80           | 0.17          | 0.09                                           | 0.68                                                       | 0.08          |
| Colon cancer                     | 1.5            | 5.1         | 0.64    | 0.96          | 0.87           | 0.77           | 0.20          | 0.12                                           | 0.64                                                       | 0.06          |
| Bladder Cancer                   | 1              | 1.7         | 0.16    | 0.79          | 0.71           | 0.65           | 0.74          | 0.70                                           | 0.52                                                       | 0.00          |
| Stomach cancer                   | 1              | 6           | 0.63    | 0.97          | 0.88           | 0.78           | 0.19          | 0.10                                           | 0.62                                                       | 0.04          |
| Bipolar disorder                 | 1              | 6.8         | 0.69    | 0.97          | 0.89           | 0.80           | 0.17          | 0.08                                           | 0.63                                                       | 0.05          |
| Bipolar disorder                 | 0.45           | 7.9         | 0.60    | 0.97          | 0.90           | 0.80           | 0.17          | 0.07                                           | 0.57                                                       | 0.01          |
| Schizophrenia                    | 0.85           | 8.6         | 0.76    | 0.98          | 0.90           | 0.81           | 0.15          | 0.07                                           | 0.66                                                       | 0.06          |
| Schizophrenia                    | 0.4            | 9           | 0.63    | 0.98          | 0.90           | 0.80           | 0.15          | 0.06                                           | 0.56                                                       | 0.01          |
| Rheumatoid Arthritis             | 0.75           | 8           | 0.70    | 0.98          | 0.90           | 0.80           | 0.16          | 0.07                                           | 0.60                                                       | 0.02          |
| Type-I diabetes                  | 0.54           | 13.7        | 0.86    | 1.00          | 0.93           | 0.84           | 0.12          | 0.04                                           | 0.64                                                       | 0.03          |
| Crohn's disease                  | 0.1            | 26          | 0.76    | 1.00          | 0.95           | 0.86           | 0.10          | 0.02                                           | 0.58                                                       | 0.01          |
| Systemic lupus erythematosus ]   | 0.03           | 30          | 0.64    | 1.00          | 0.95           | 0.86           | 0.10          | 0.02                                           | 0.50                                                       | 0.00          |

**a:**  $AUC_{max}$  is the maximum AUC possible based on the genetic epidemiology parameters of disease prevalence ( $K$ ) and sibling recurrence risk ( $\lambda_S$ ) i.e. when all the known genetic variance is explained by the genomic profile,  $\rho_{GG}^2 = 1$ . **b:**  $AUC_{half}$  is the AUC possible if the variants included in the genomic profile explain half of the known genetic variance i.e.,  $\rho_{GG}^2 = 0.5$ . **c:**  $AUC_{quar}$  is the AUC possible if the variants included in the genomic profile explain 1/4 of the known genetic variance i.e.,  $\rho_{GG}^2 = 0.25$  **d:**  $\rho_{GG}^2$  and  $\lambda_{S[x]}/\lambda_S$  when the measured AUC for a genomic profile is 0.75. **e:** AUC,  $\rho_{GG}^2$  and proportion of sibling risk explained  $\frac{(\lambda_{S[x]}-1)}{(\lambda_S-1)}$  by a prediction based on full knowledge of disease status of three generations of relatives from simulation . NB The online calculator presents family history results from equation S1.
